# Supplementary material for: Exposure to Violence Accelerates Epigenetic Aging in Children
Source: PubMed Central journal article supplement (PMC5566406; doi:10.1038/s41598-017-09235-9), 2017-08-21

## Supplemental Information

### Exposure to Violence Accelerates Epigenetic Aging in Children

Tanja Jovanovic, PhD<sup>1</sup>, L. Alexander Vance, MA<sup>1</sup>, Dorthie Cross, PhD<sup>1</sup>, Anna K Knight, BS<sup>2</sup>, Varun

Kilaru, PhD<sup>1</sup>, Vasiliki Michopoulos, PhD<sup>1</sup>, Torsten Klengel, PhD<sup>3</sup>, Alicia K. Smith, PhD<sup>1</sup>

#### SREP-16-47171A

<sup>1</sup>Department of Psychiatry and Behavioral Sciences  
Emory University School of Medicine  
101 Woodruff Circle NE (Clifton RD NE)  
Atlanta, GA 30322

<sup>2</sup>Genetics and Molecular Biology Program  
101 Woodruff Circle NE (Clifton RD NE)  
Atlanta, GA 30322

<sup>3</sup>Neurobiology of Fear Laboratory  
McLean Hospital  
115 Mill Street  
Belmont, MA 02478

#### Corresponding Author:

**Tanja Jovanovic, PhD**

Department of Psychiatry & Behavioral Sciences  
Emory University School of Medicine  
49 Jesse Hill Jr Dr  
Atlanta, GA 30303, USA  
+1 404 778 1485  
[tjovano@emory.edu](mailto:tjovano@emory.edu)

**Running title:** Epigenetic Aging in Children

**Figure S1.** DNA methylation differences associated with violence exposure. On this Manhattan plot, the x-axis is the position of each CpG site by chromosome, and the y-axis is the negative  $\log_{10}$  of the p-value for association of each CpG site with violence exposure. The black line indicates experiment-wide significance.

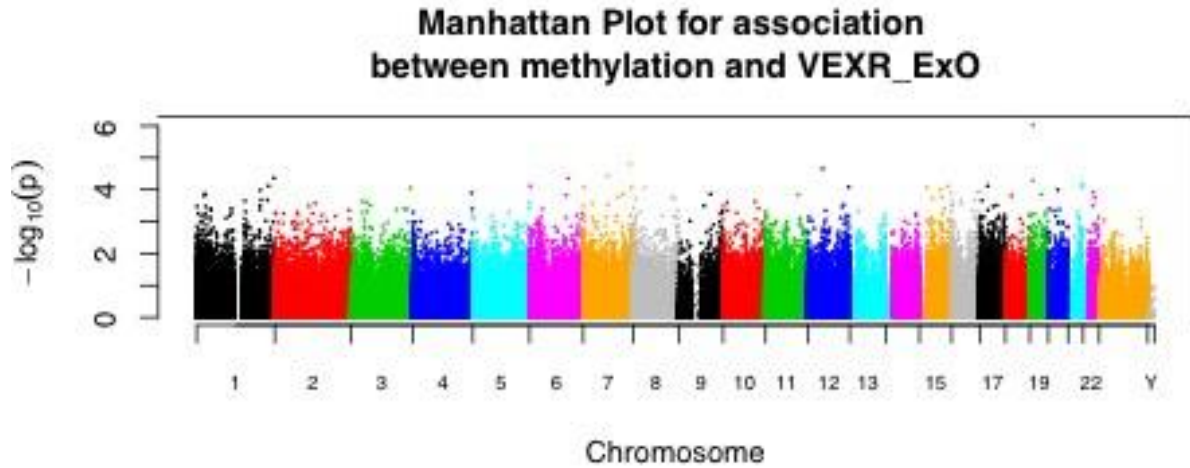

**Figure S2.** Scatter plot of DNAm Age and Chronological Age

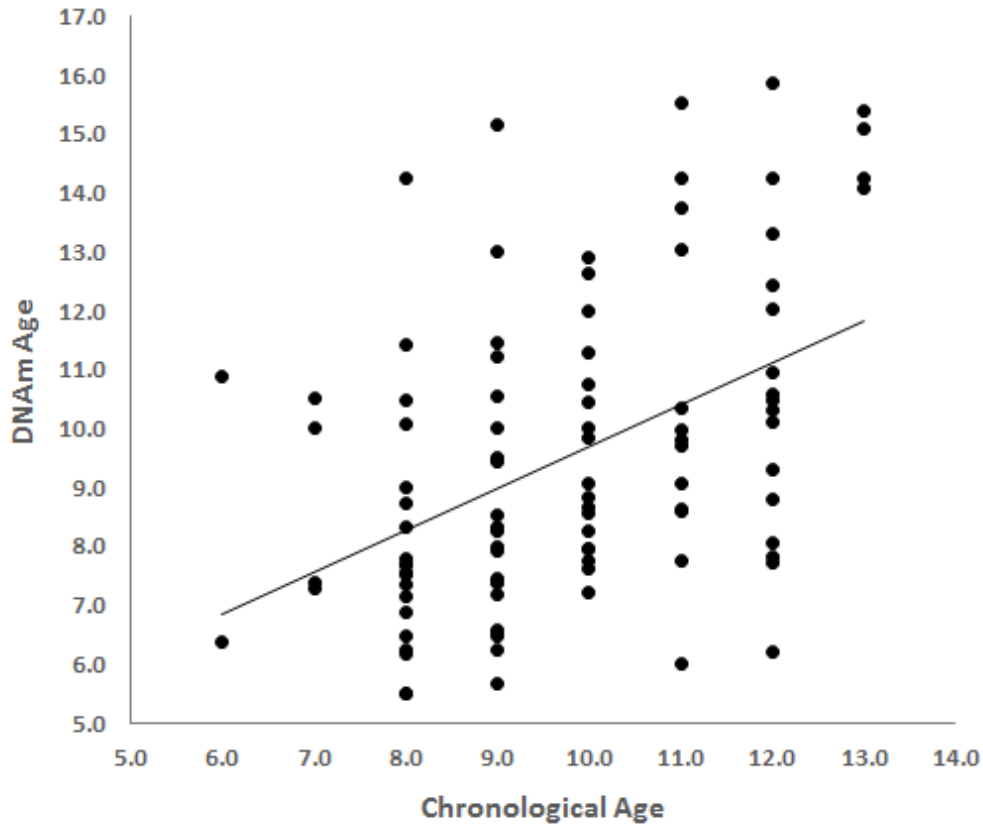

Supplement: 41598_2017_9235_MOESM1_ESM.pdf [file 41598_2017_9235_MOESM1_ESM.pdf]
